# Supplementary material
Source: publisher figshare collection journal article supplement (https://frontiersin.figshare.com/ndownloader/files/31793687)
Supplement: Supplementary file [file 31793687]

**eTable 1 Relationship between heart rate and locomotor performance at study conclusion**

|                     | Non-Exercise          |                 | Exercise              |                 |
|---------------------|-----------------------|-----------------|-----------------------|-----------------|
| Locomotor Parameter | Pearson's Coefficient | <i>p</i> -value | Pearson's Coefficient | <i>p</i> -value |
| Ambulatory Time     | -0.2436               | ns              | 0.4229                | ns              |
| Total Distance      | -0.2860               | ns              | 0.6006                | ns              |
| Speed               | -0.3423               | ns              | -0.3804               | ns              |

Pearson's correlation was used to determine if a significant relationship existed between heart rate and individual locomotor performance after two months of the exercise regimen (20 months of age) for the non-exercise (NE) and exercise (EX) groups; ns = nonsignificant.

**eTable 2 Relationship between mean arterial pressure and locomotor performance at study conclusion**

|                     | Non-Exercise          |                 | Exercise              |                 |
|---------------------|-----------------------|-----------------|-----------------------|-----------------|
| Locomotor Parameter | Pearson's Coefficient | <i>p</i> -value | Pearson's Coefficient | <i>p</i> -value |
| Ambulatory Time     | 0.1841                | ns              | 0.0355                | ns              |
| Total Distance      | 0.2228                | ns              | -0.0100               | ns              |
| Speed               | 0.2480                | ns              | 0.6926                | ns              |

Pearson's correlation was used to determine if a significant relationship existed between mean arterial pressure and individual locomotor performance after two months of the exercise regimen (20 months of age) for the NE and EX groups; ns = nonsignificant.

**eTable 3 Relationship between body weight and locomotor performance at study initiation**

| Locomotor Parameter | Pearson's Coefficient | <i>p</i> -value |
|---------------------|-----------------------|-----------------|
| Ambulatory Time     | -0.1202               | ns              |
| Total Distance      | -0.1511               | ns              |
| Speed               | -0.2515               | ns              |

Pearson's correlation was used to determine if a significant relationship existed between body weight and individual locomotor performance at study initiation for the longitudinal exercise study; ns = nonsignificant.

**eTable 4 Relationship between body weight and locomotor performance at 20 months of age**

|                     | Non-Exercise          |                 | Exercise              |                 |
|---------------------|-----------------------|-----------------|-----------------------|-----------------|
| Locomotor Parameter | Pearson's Coefficient | <i>p</i> -value | Pearson's Coefficient | <i>p</i> -value |
| Ambulatory Time     | 0.0060                | ns              | -0.3783               | ns              |
| Total Distance      | -0.2238               | ns              | -0.5649               | ns              |
| Speed               | -0.3411               | ns              | -0.4306               | ns              |

Pearson's correlation was used to determine if a significant relationship existed between body weight and individual locomotor performance after two months of the exercise regimen (20 months of age) for the NE and EX groups in the longitudinal exercise study; ns = nonsignificant.

**eTable 5 Relationship between body weight and locomotor performance at 23 months of age**

|                     | Non-Exercise          |                 | Exercise              |                 |
|---------------------|-----------------------|-----------------|-----------------------|-----------------|
| Locomotor Parameter | Pearson's Coefficient | <i>p</i> -value | Pearson's Coefficient | <i>p</i> -value |
| Ambulatory Time     | 0.0803                | ns              | 0.2251                | ns              |
| Total Distance      | -0.0822               | ns              | -0.5640               | ns              |
| Speed               | 0.2277                | ns              | 0.3791                | ns              |

Pearson's correlation was used to determine if a significant relationship existed between body weight and individual locomotor performance at study conclusion for the NE and EX groups for the longitudinal exercise study; ns = nonsignificant.

**eTable 6 Relationship between food consumption and locomotor performance at 20 months of age**

|                     | Non-Exercise          |                 | Exercise              |                 |
|---------------------|-----------------------|-----------------|-----------------------|-----------------|
| Locomotor Parameter | Pearson's Coefficient | <i>p</i> -value | Pearson's Coefficient | <i>p</i> -value |
| Ambulatory Time     | 0.3348                | ns              | -0.1811               | ns              |
| Total Distance      | 0.2806                | ns              | -0.6461               | ns              |
| Speed               | 0.1453                | ns              | -0.3574               | ns              |

Pearson's correlation was used to determine if a significant relationship existed between food consumption and individual locomotor performance after two months of the exercise regimen (20 months of age) for the NE and EX groups in the longitudinal exercise study; ns = nonsignificant.

**eTable 7 Relationship between food consumption and locomotor performance at 23 months of age**

|                     | Non-Exercise          |                 | Exercise              |                 |
|---------------------|-----------------------|-----------------|-----------------------|-----------------|
| Locomotor Parameter | Pearson's Coefficient | <i>p</i> -value | Pearson's Coefficient | <i>p</i> -value |
| Ambulatory Time     | -0.0065               | ns              | 0.3069                | ns              |
| Total Distance      | 0.0916                | ns              | 0.7024                | ns              |
| Speed               | 0.1991                | ns              | 0.4695                | ns              |

Pearson's correlation was used to determine if a significant relationship existed between food consumption and individual locomotor performance at study conclusion for the NE and EX groups in the longitudinal exercise study; ns = nonsignificant.

**eFigure 1.**

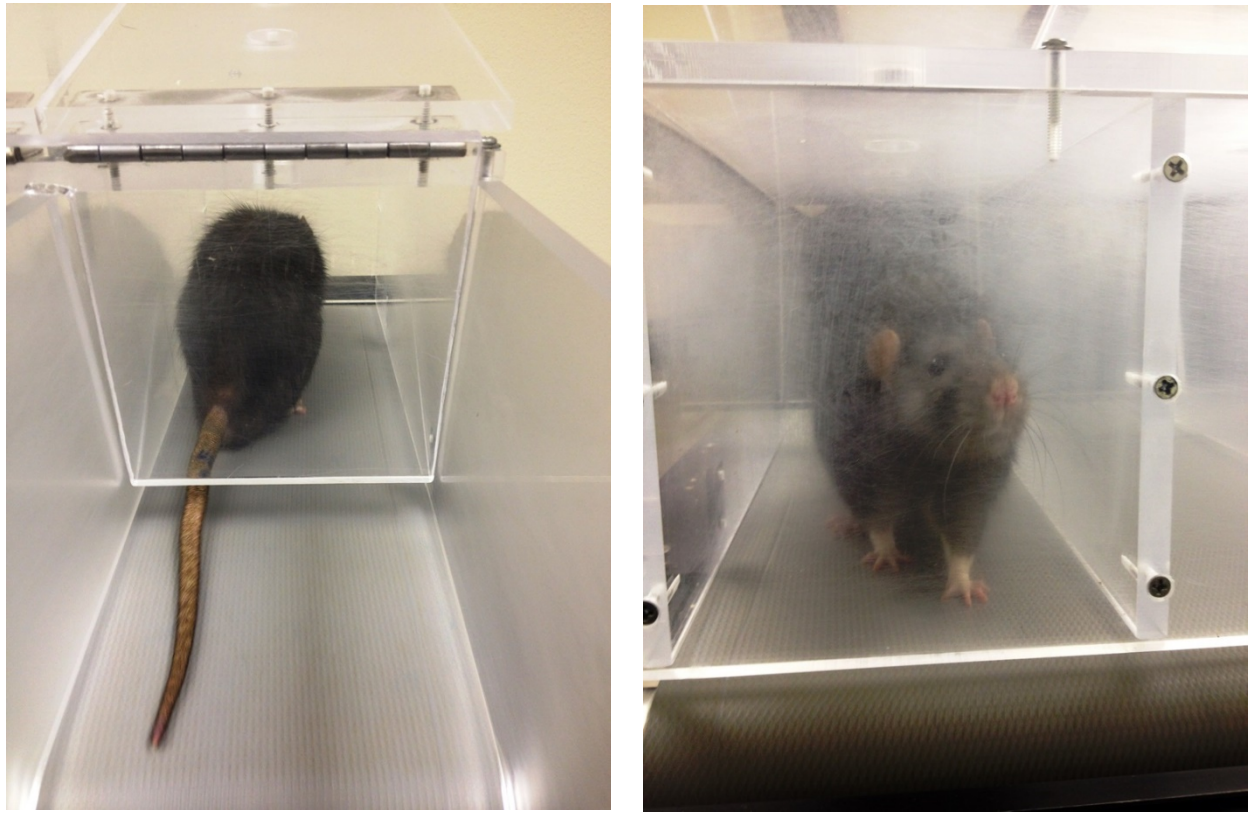

**Treadmill exercise environment.** The Brown-Norway F<sub>1</sub> hybrid rat is accommodated to comply to the footshock-free exercise regimen. In the left image, the clear plexiglass backstop is used to motivate the rat to keep moving, as necessary to maintain compliance, on the running treadmill. In the right image, the rat is maintaining exercise compliance by keeping pace near the front end of the treadmill.



eFigure 2.

A.

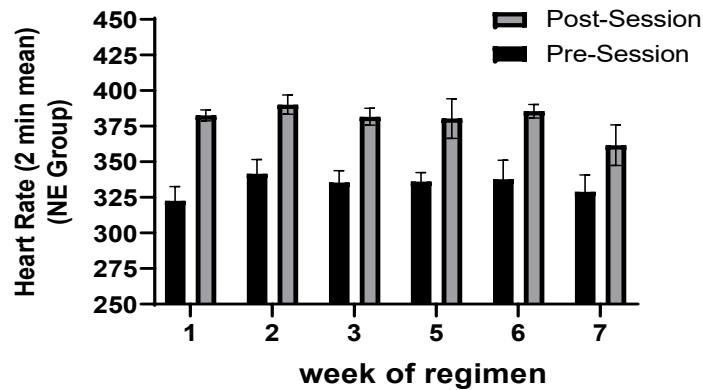

B.

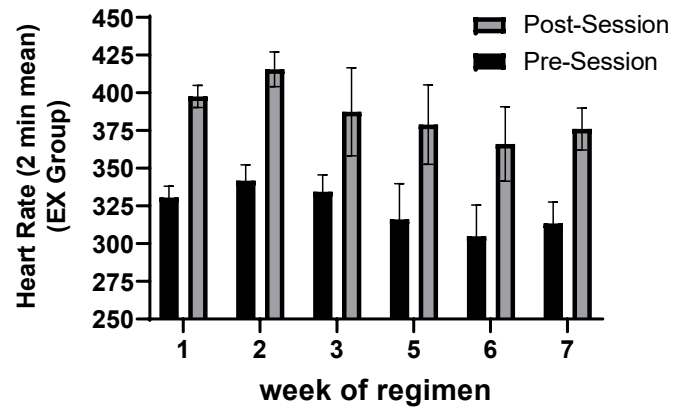

**Treadmill environment impact on heart rate (HR). A. Stationary treadmill (NE Group).**

Exposure to the stationary treadmill for the same duration as the EX group increased HR above pre-exposure levels ( $F_{(1,7)}=40.9$ ,  $p=0.0004$ ) with no effect of weeks of regimen ( $F_{(5,35)}=1.12$ , ns) or weeks of regimen x exposure to treadmill interaction ( $F_{(5,35)}=0.95$ , ns). **B. Running treadmill (EX Group).** There was a significant effect of exercise ( $F_{(1,6)}=459.4$ ,  $p<0.0001$ ) but no significant effect of weeks of regimen ( $F_{(5, 30)}=1.91$ , ns) or weeks of intervention x exercise interaction ( $F_{(5,30)}=0.25$ , ns).

eFigure 3.

A.

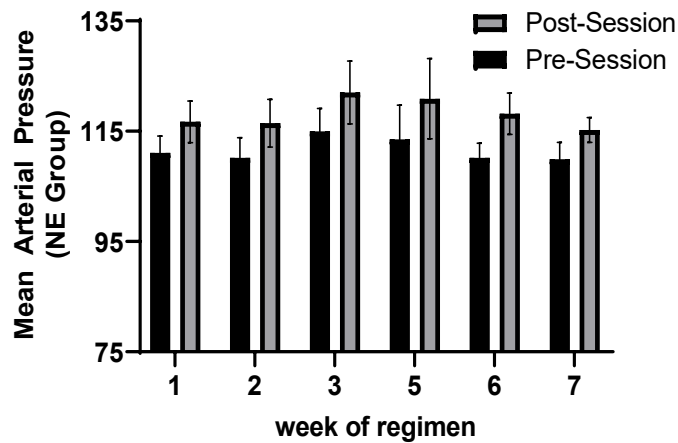

B.

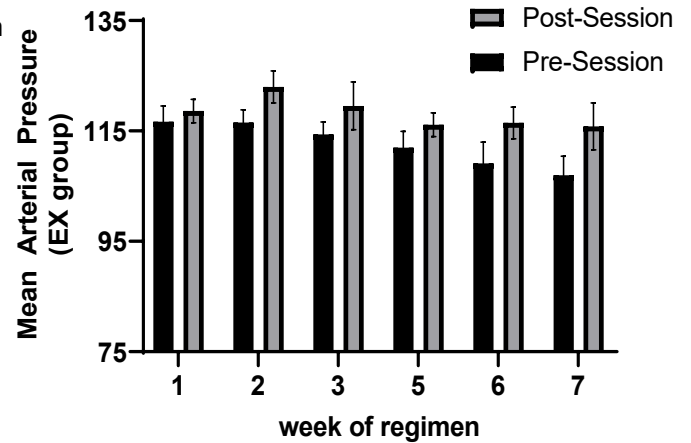

**Treadmill environment impact on mean arterial pressure (MAP). A. Stationary treadmill (NE Group).** Exposure to the stationary treadmill for the same duration as the EX group increased MAP above pre-exposure levels ( $F_{(1,7)}=19.35$ ,  $p=0.003$ ), with no effect of weeks of intervention ( $F_{(5,35)}=0.72$ , ns) or weeks of intervention x exposure to treadmill interaction ( $F_{(5,33)}=0.34$ , ns). **B. Running treadmill (EX Group).** The exercise regimen increased MAP ( $F_{(1,6)}=24.56$ ,  $p=0.003$ ), with no significant effect of weeks of intervention ( $F_{(5,30)}=1.92$ , ns) or weeks of intervention x exercise interaction ( $F_{(5,29)}=2.08$ ,  $p=0.097$ ).
